# Supplementary material
Source: PubMed Central journal article supplement (PMC522002)

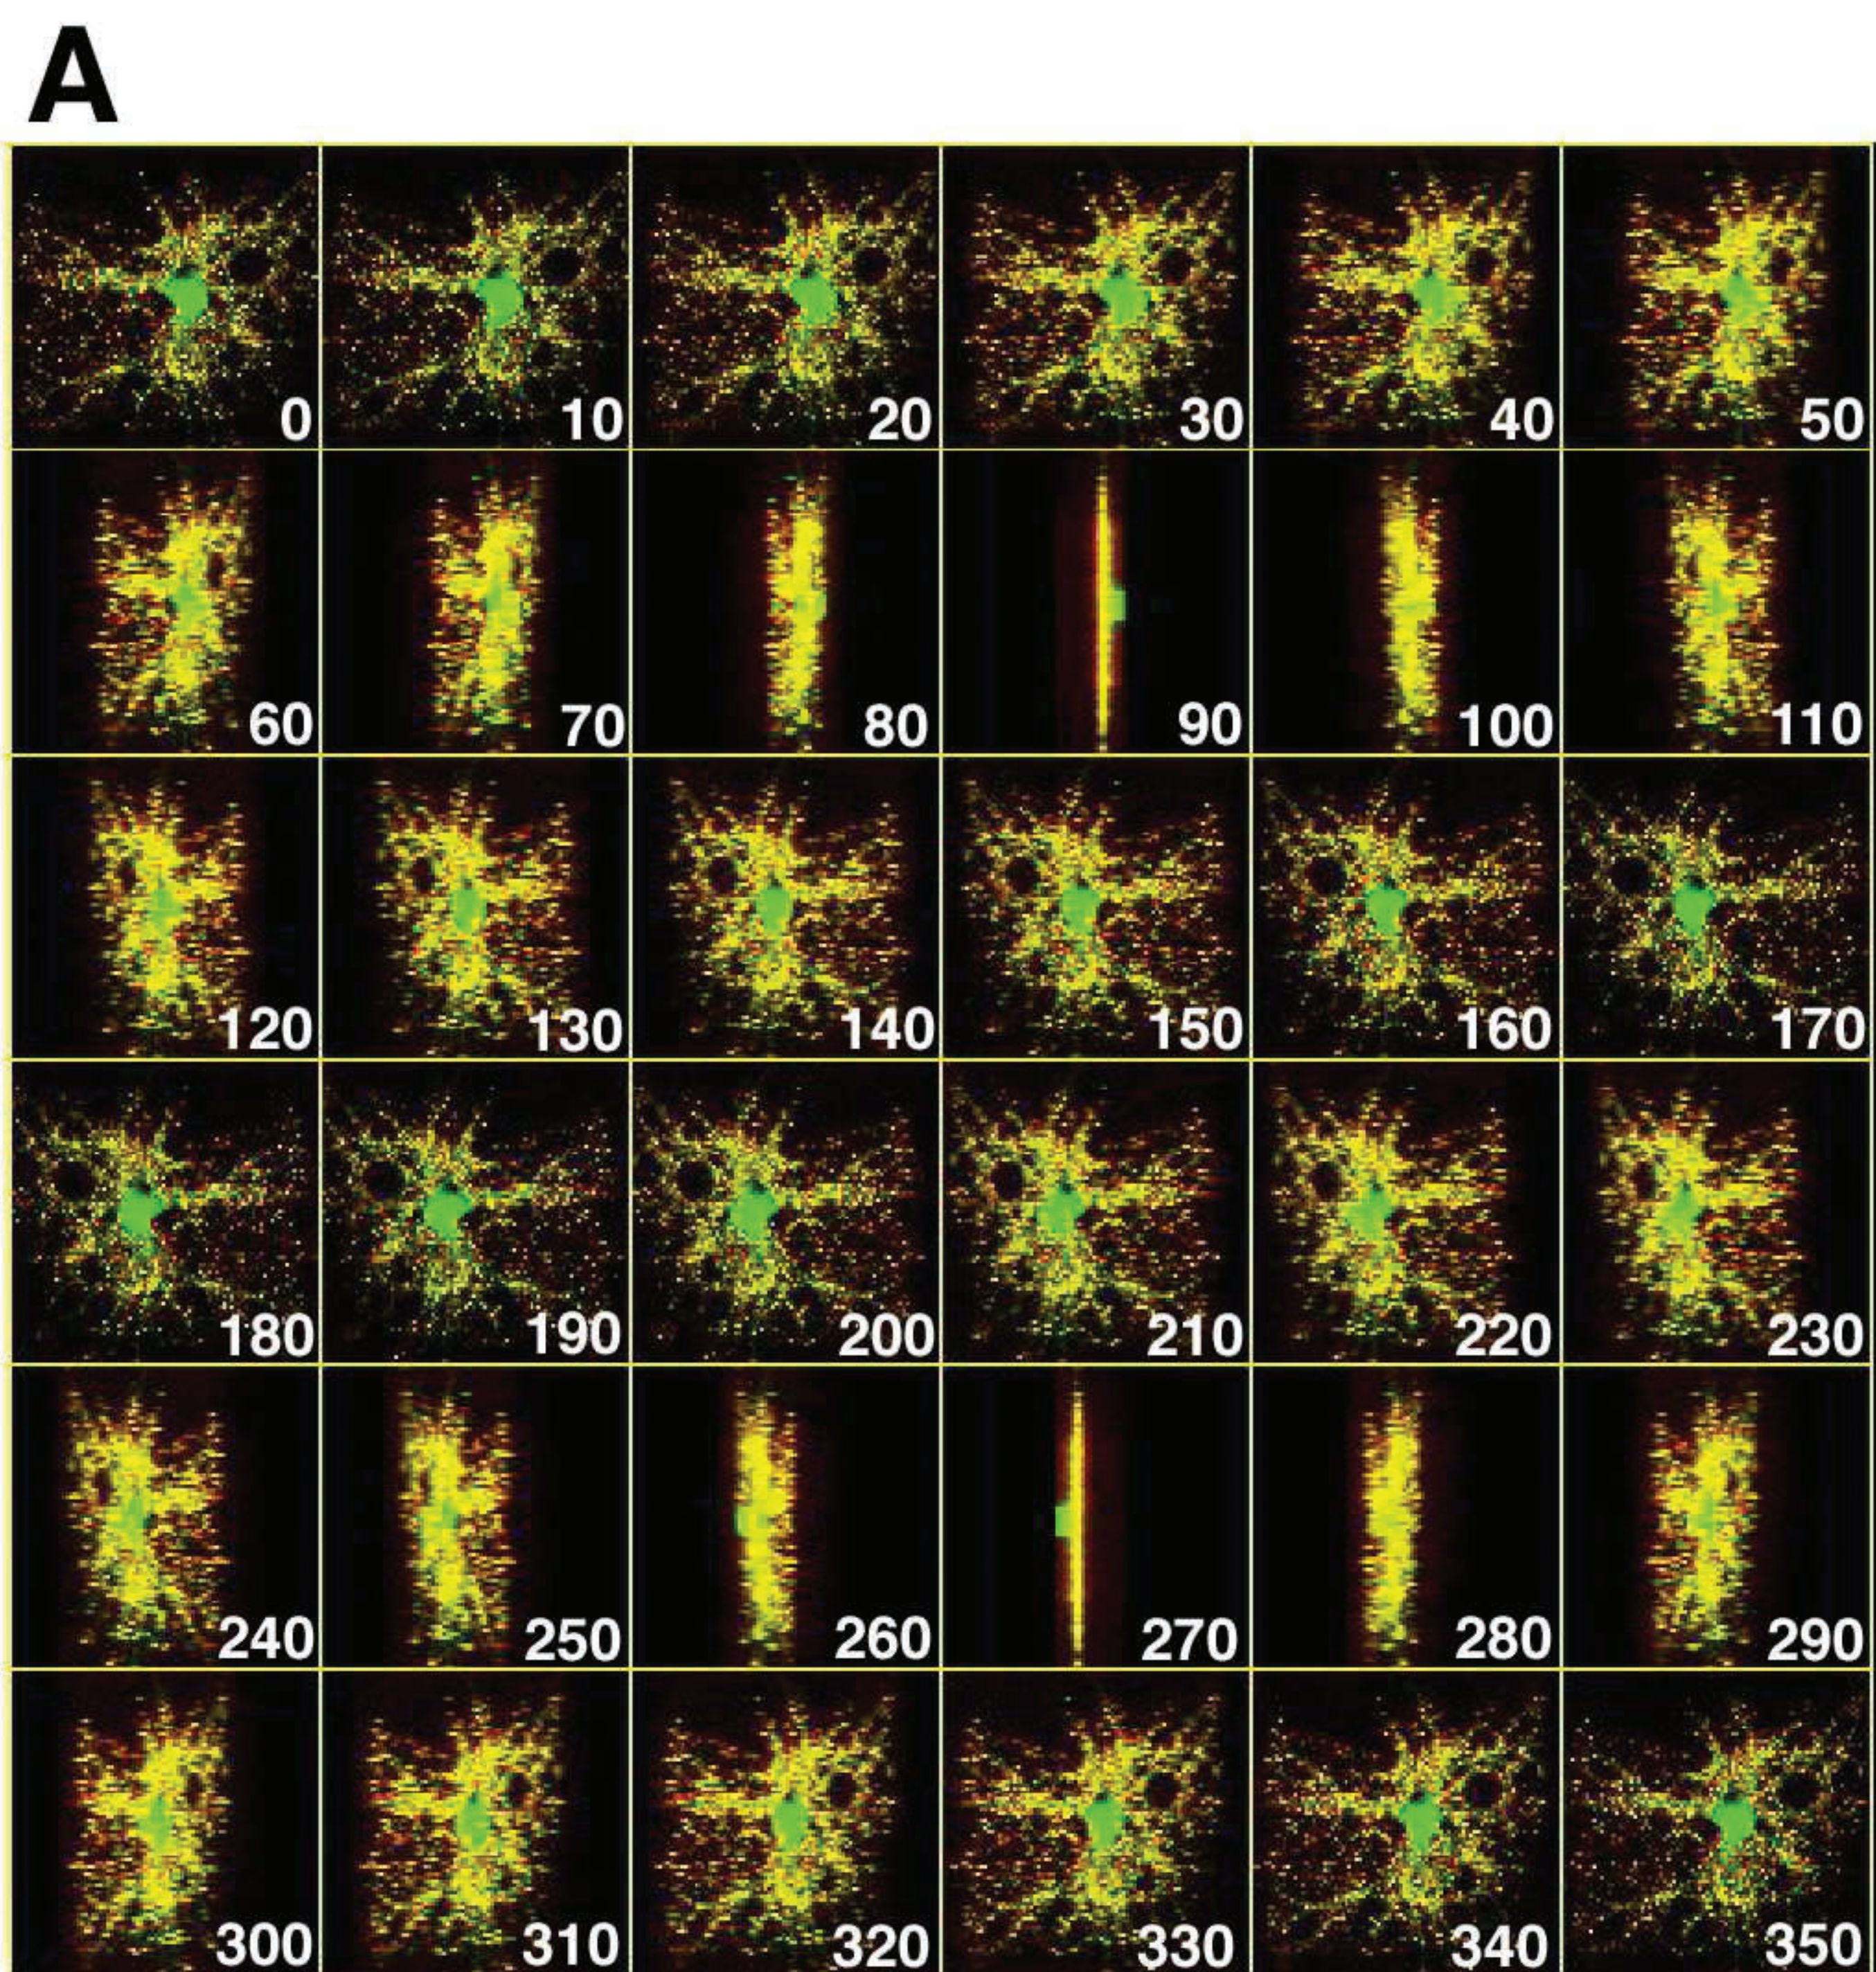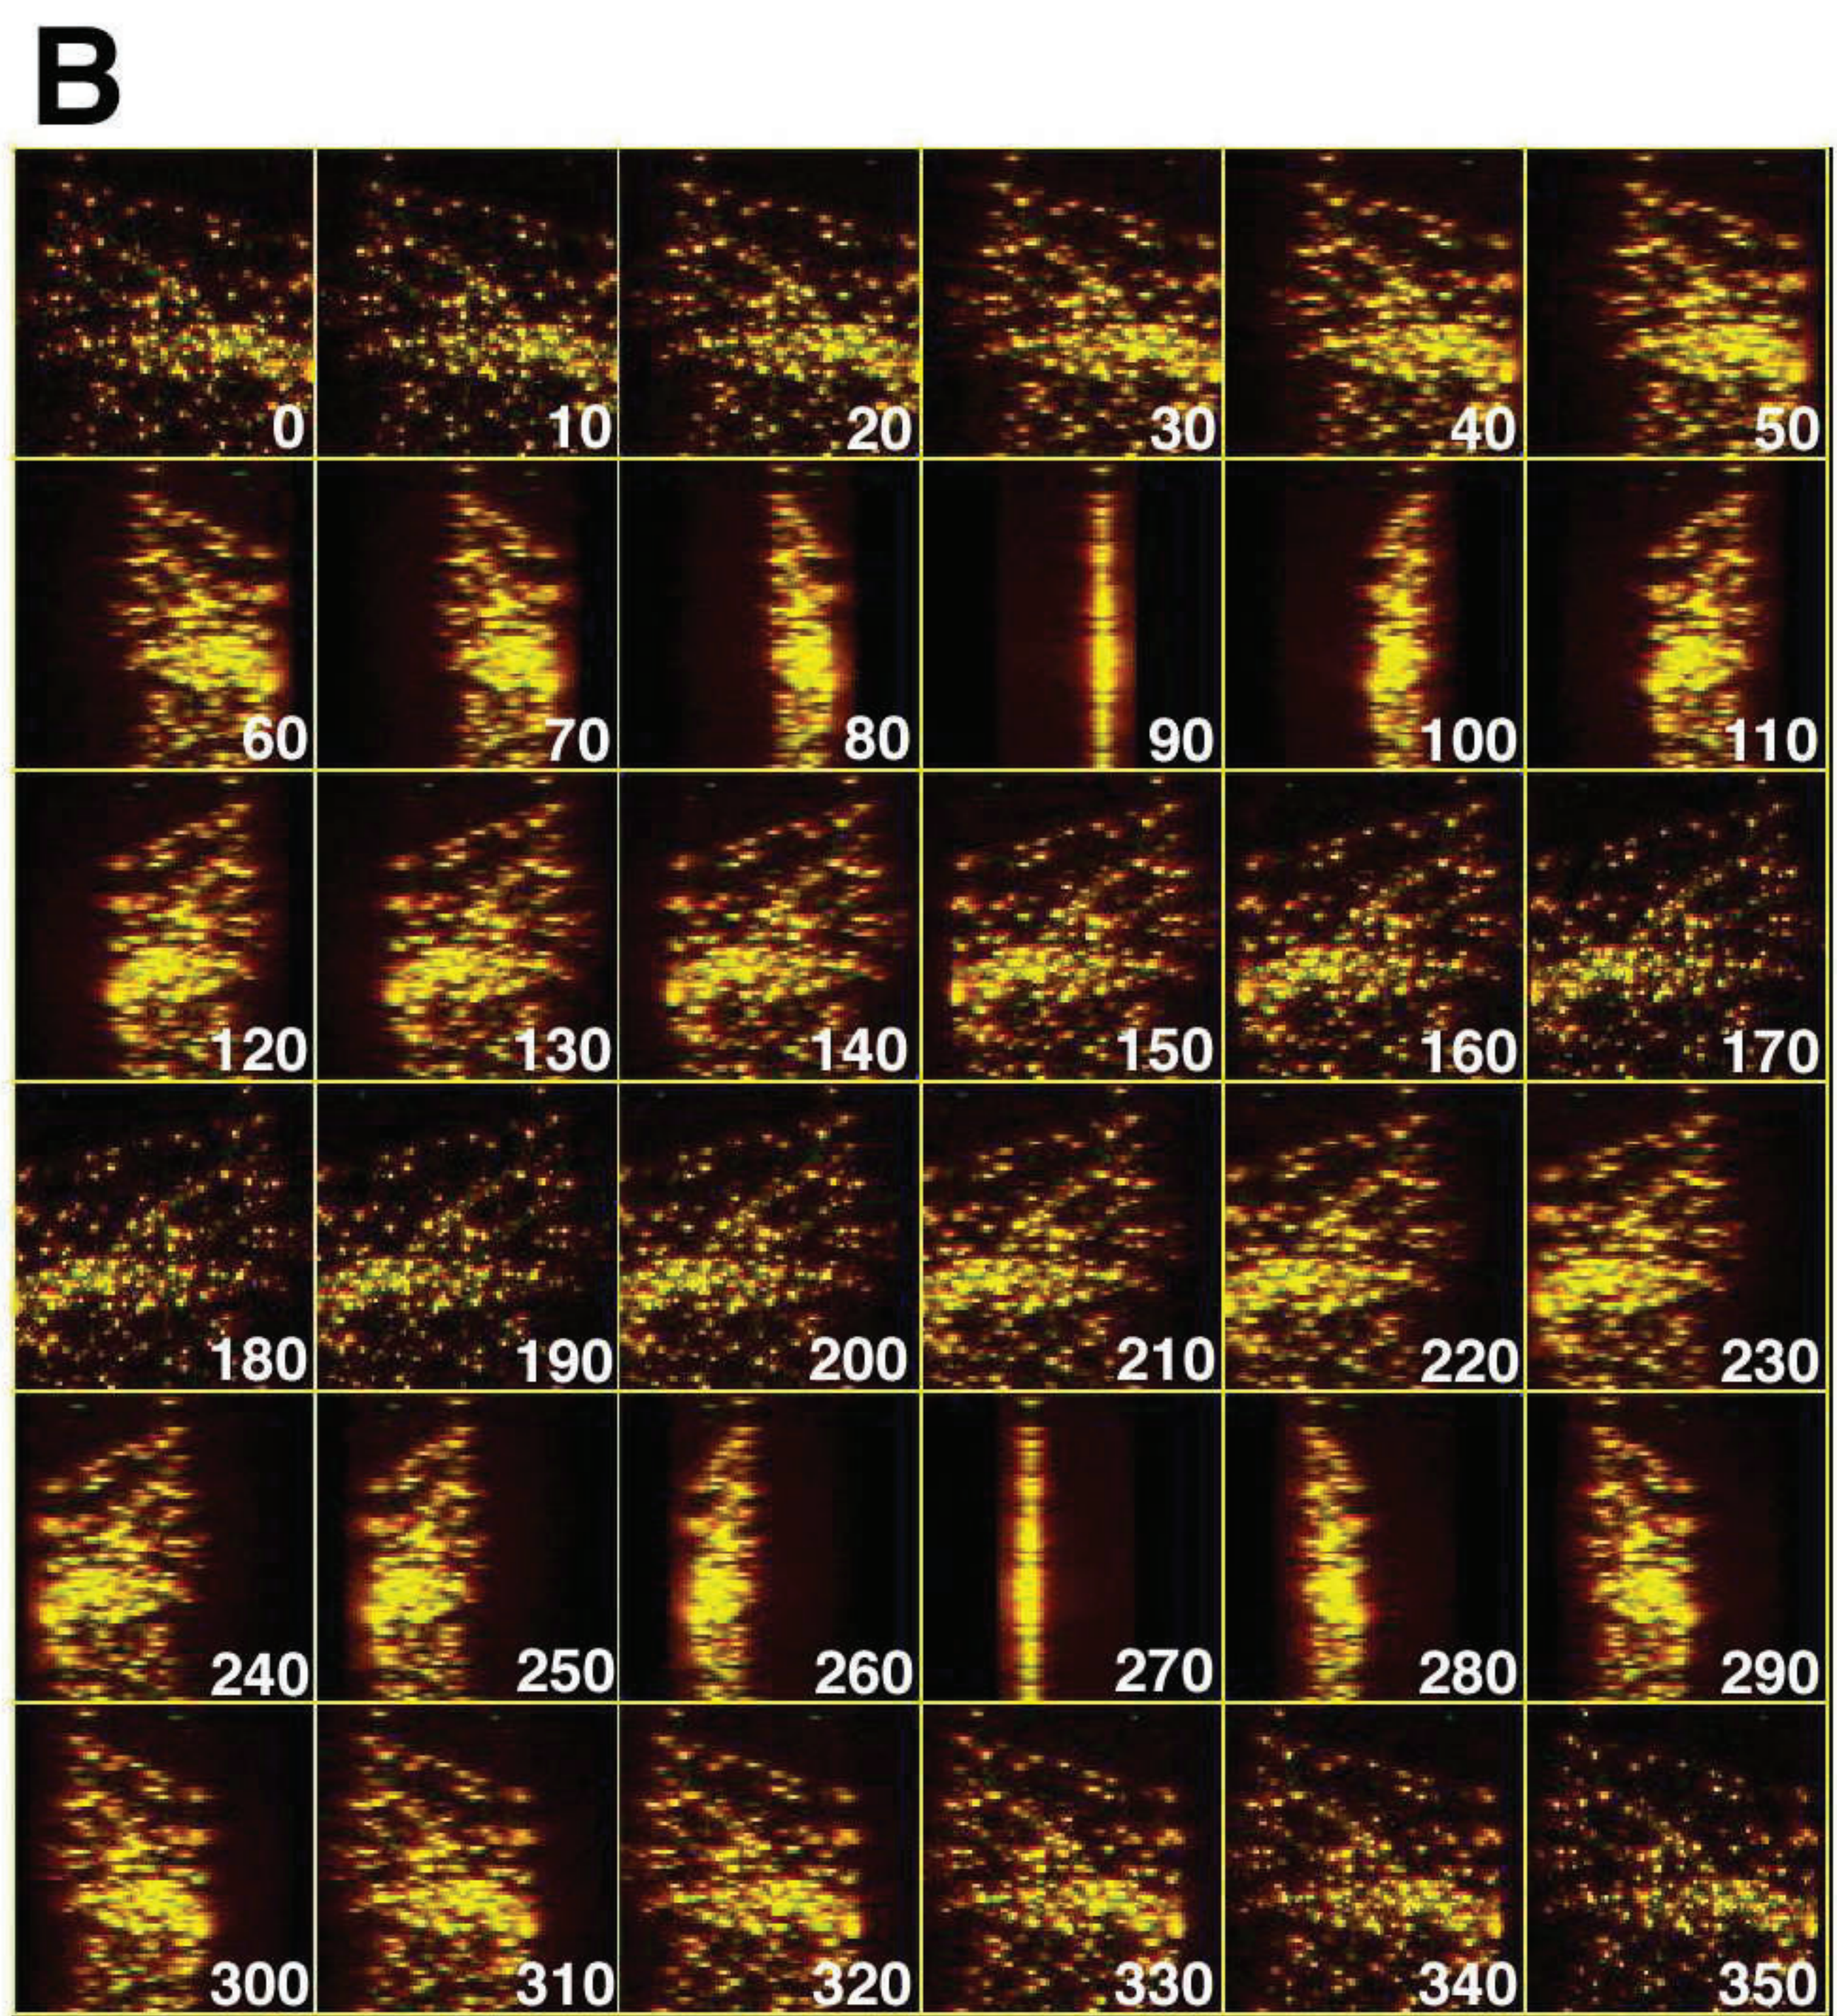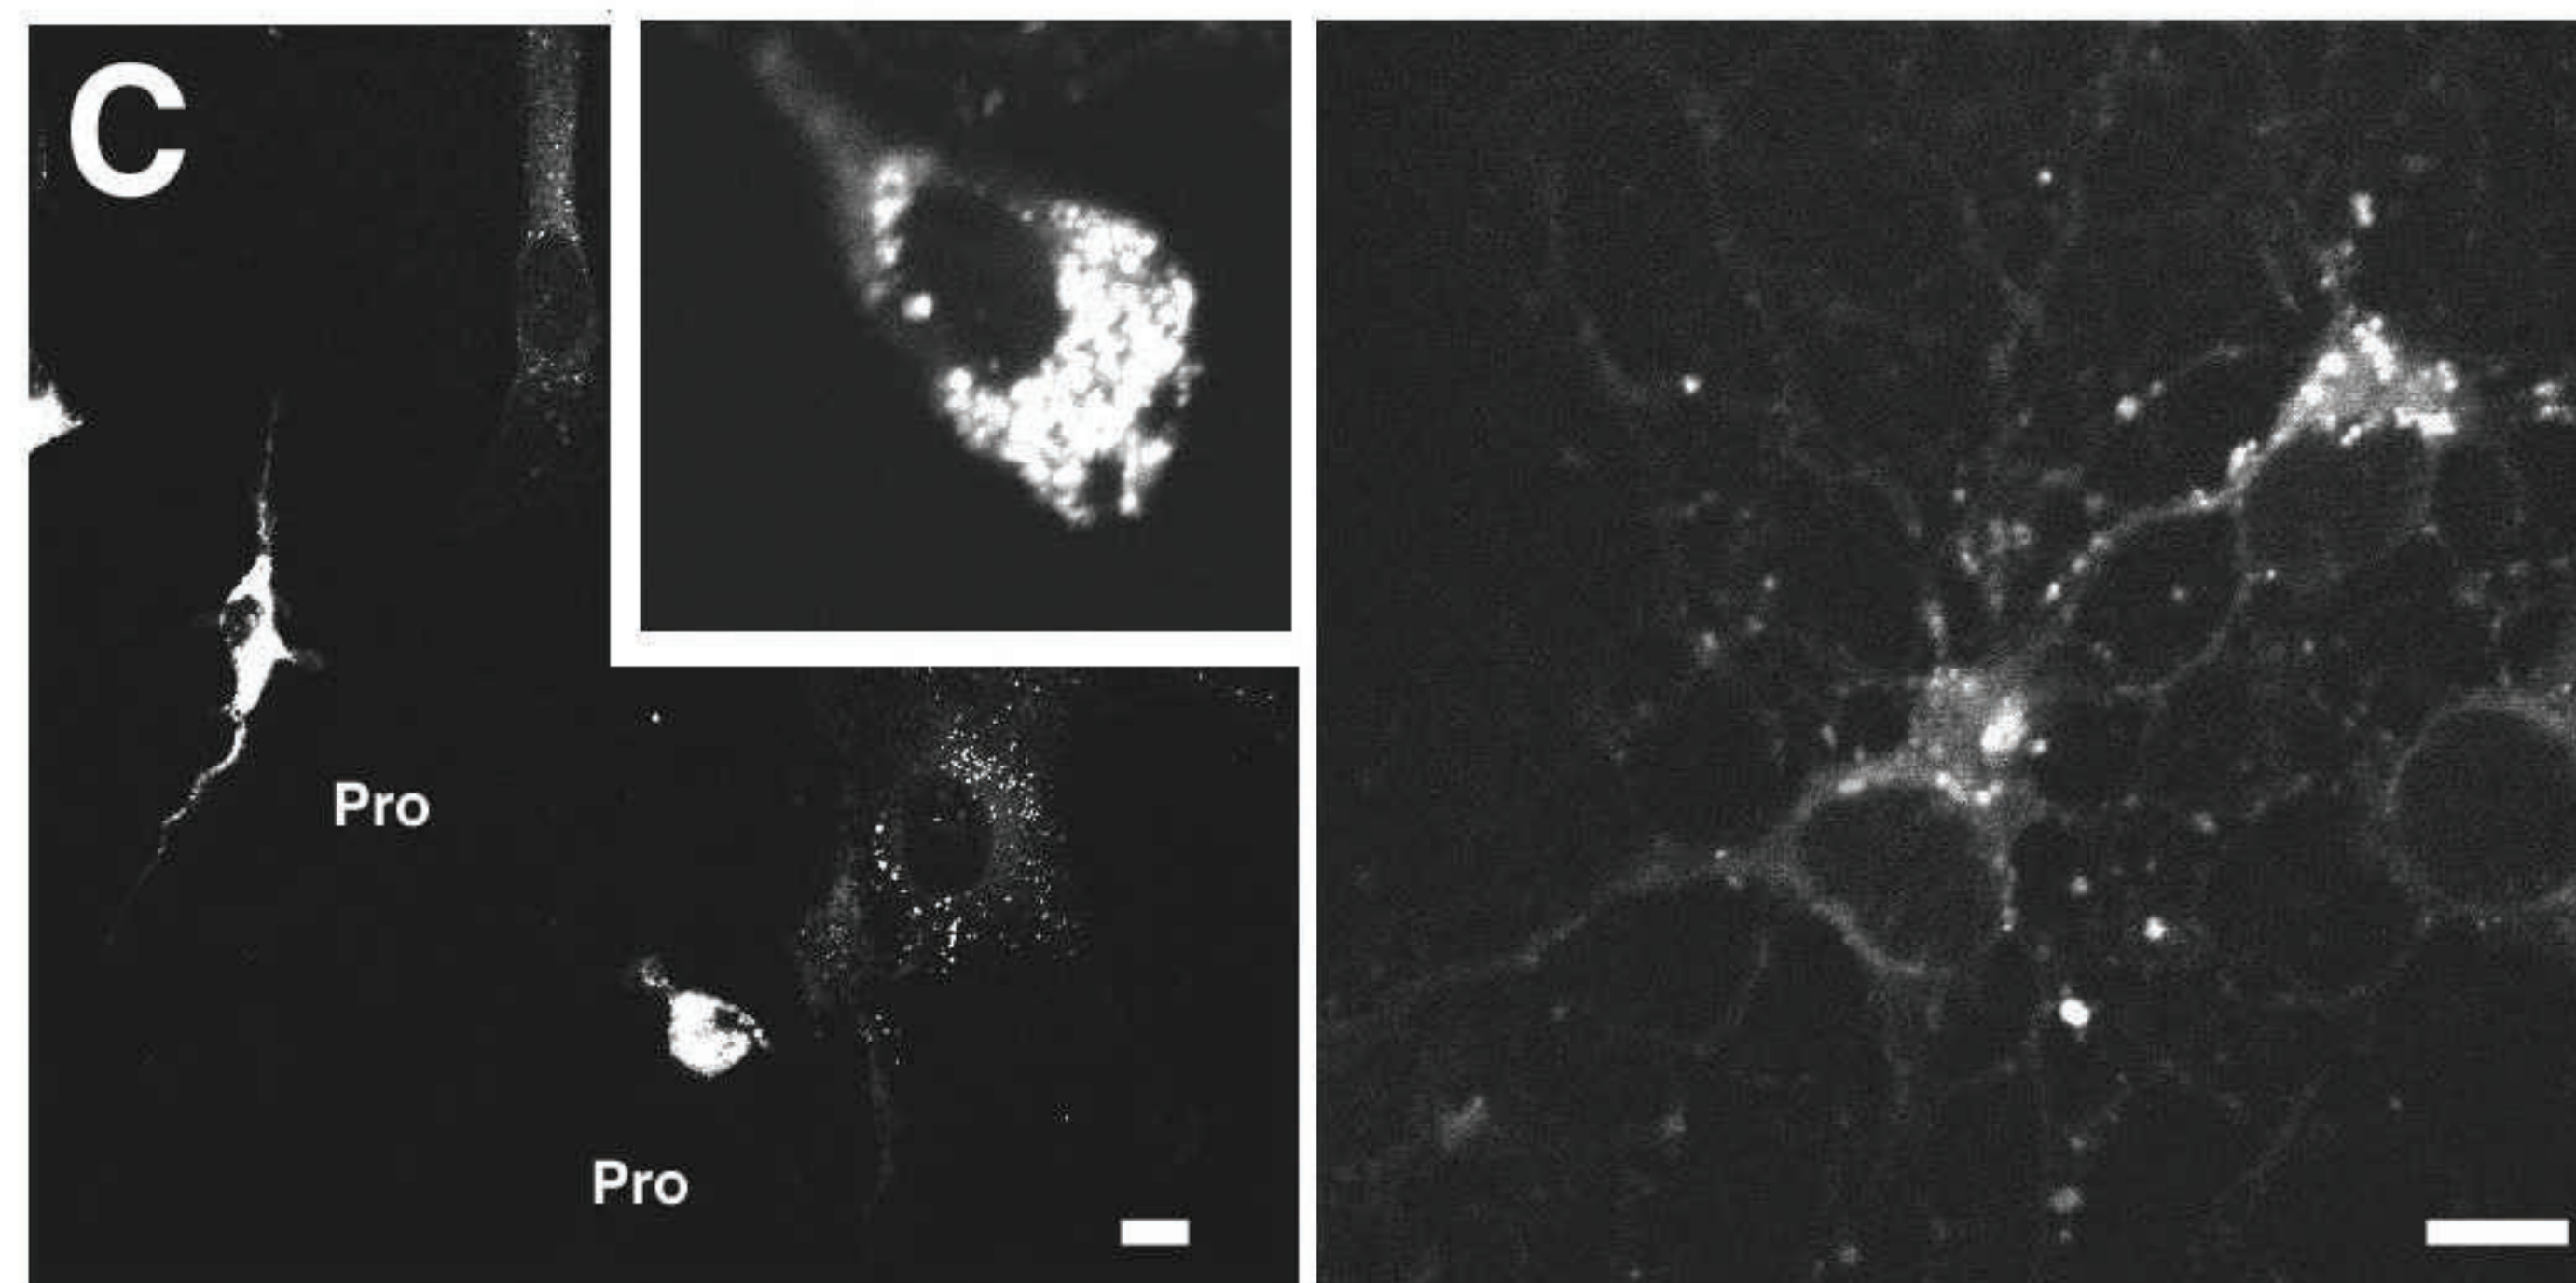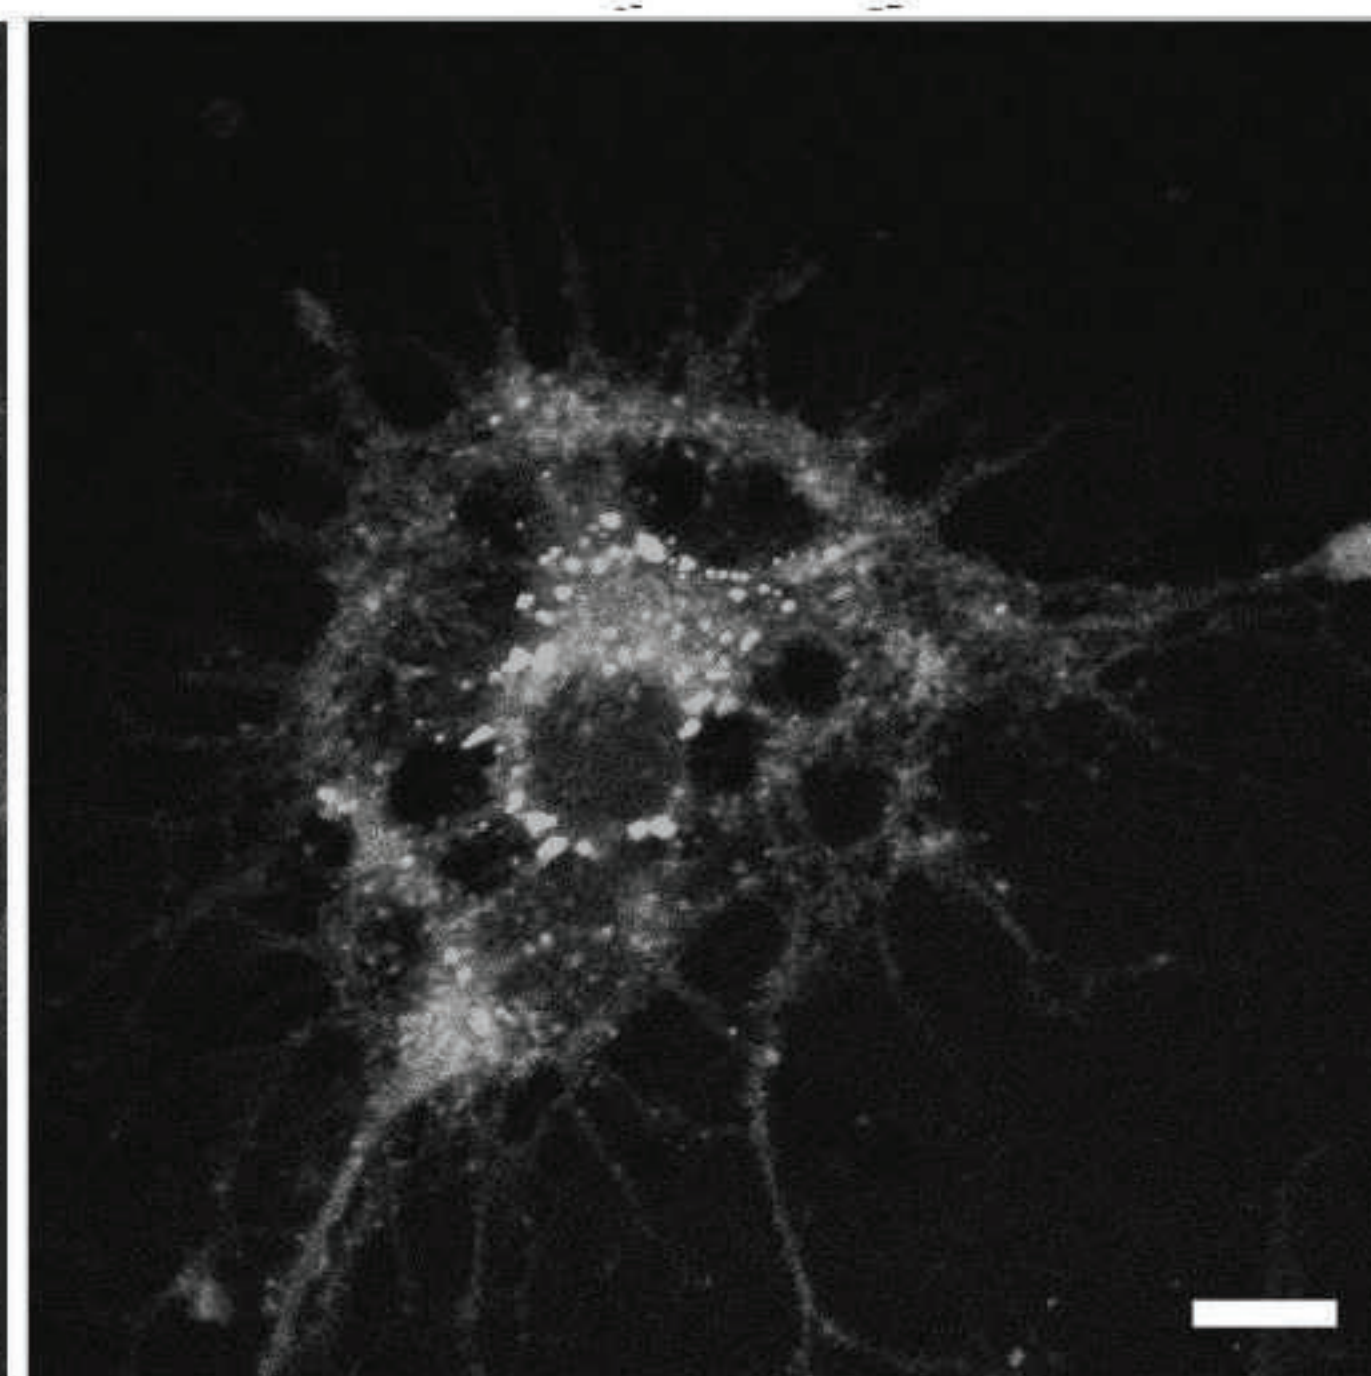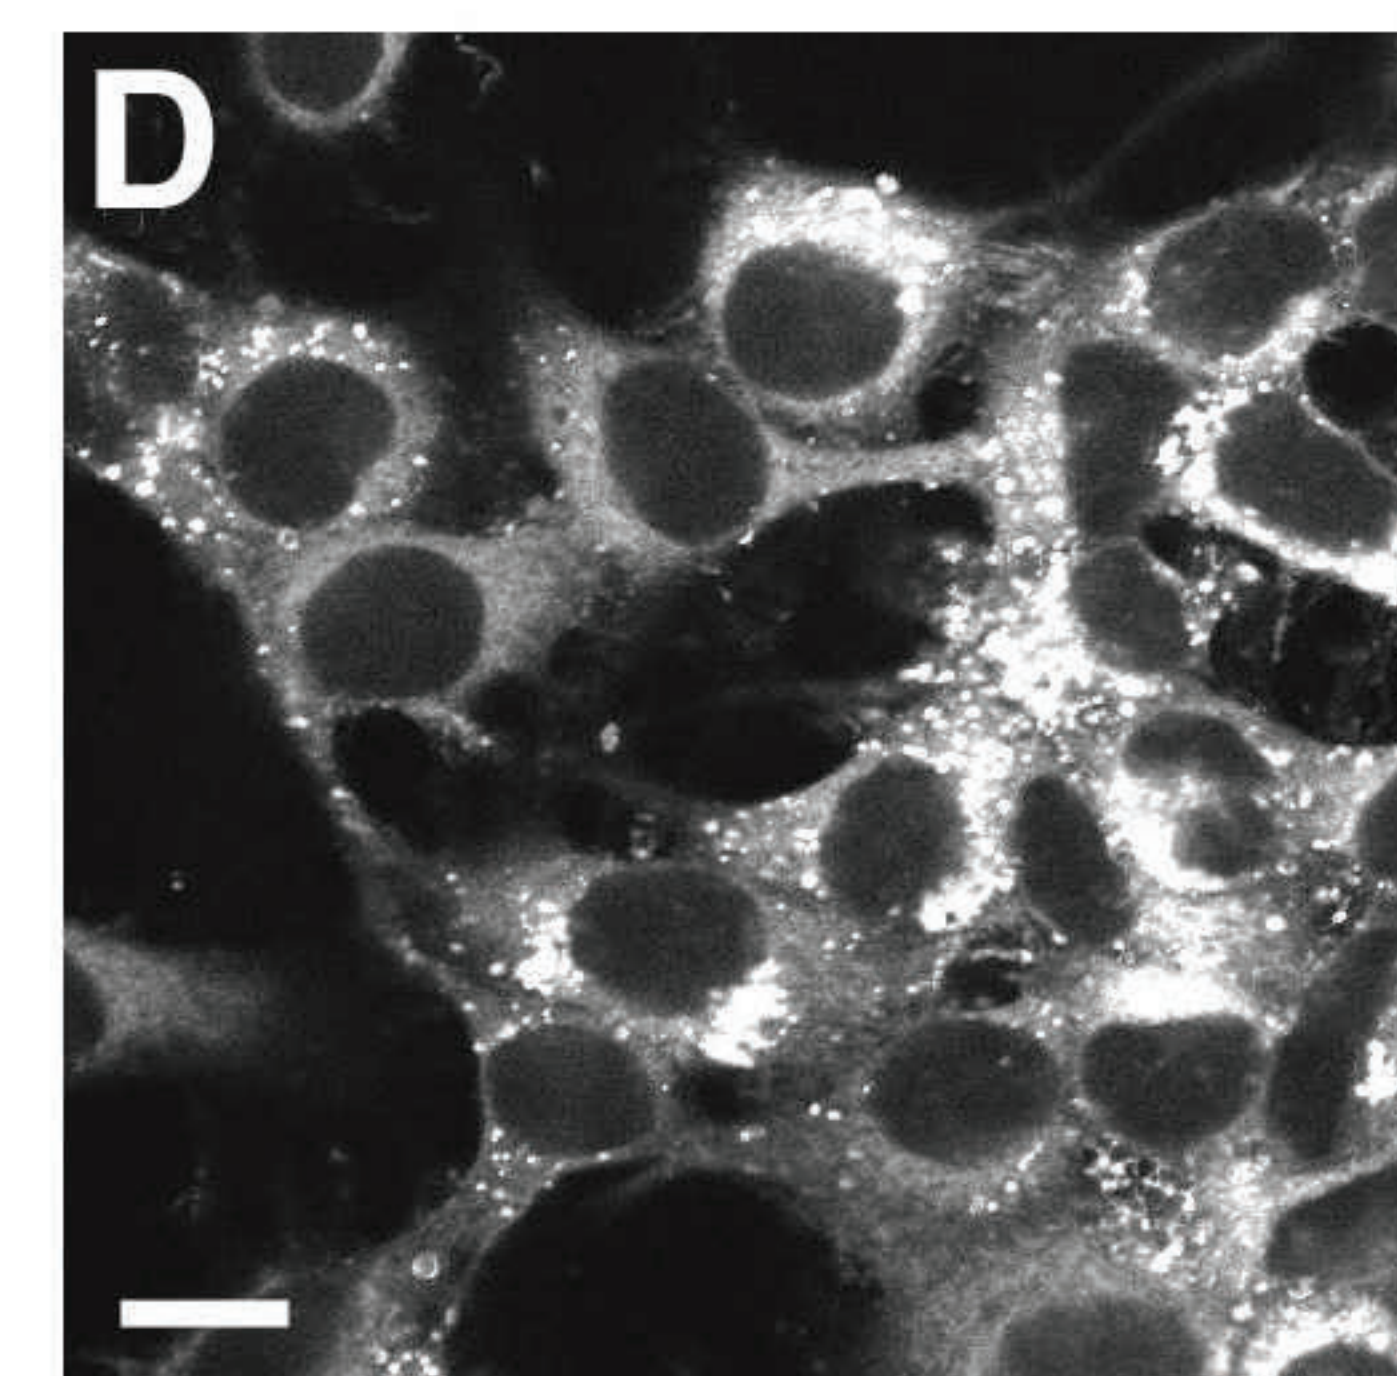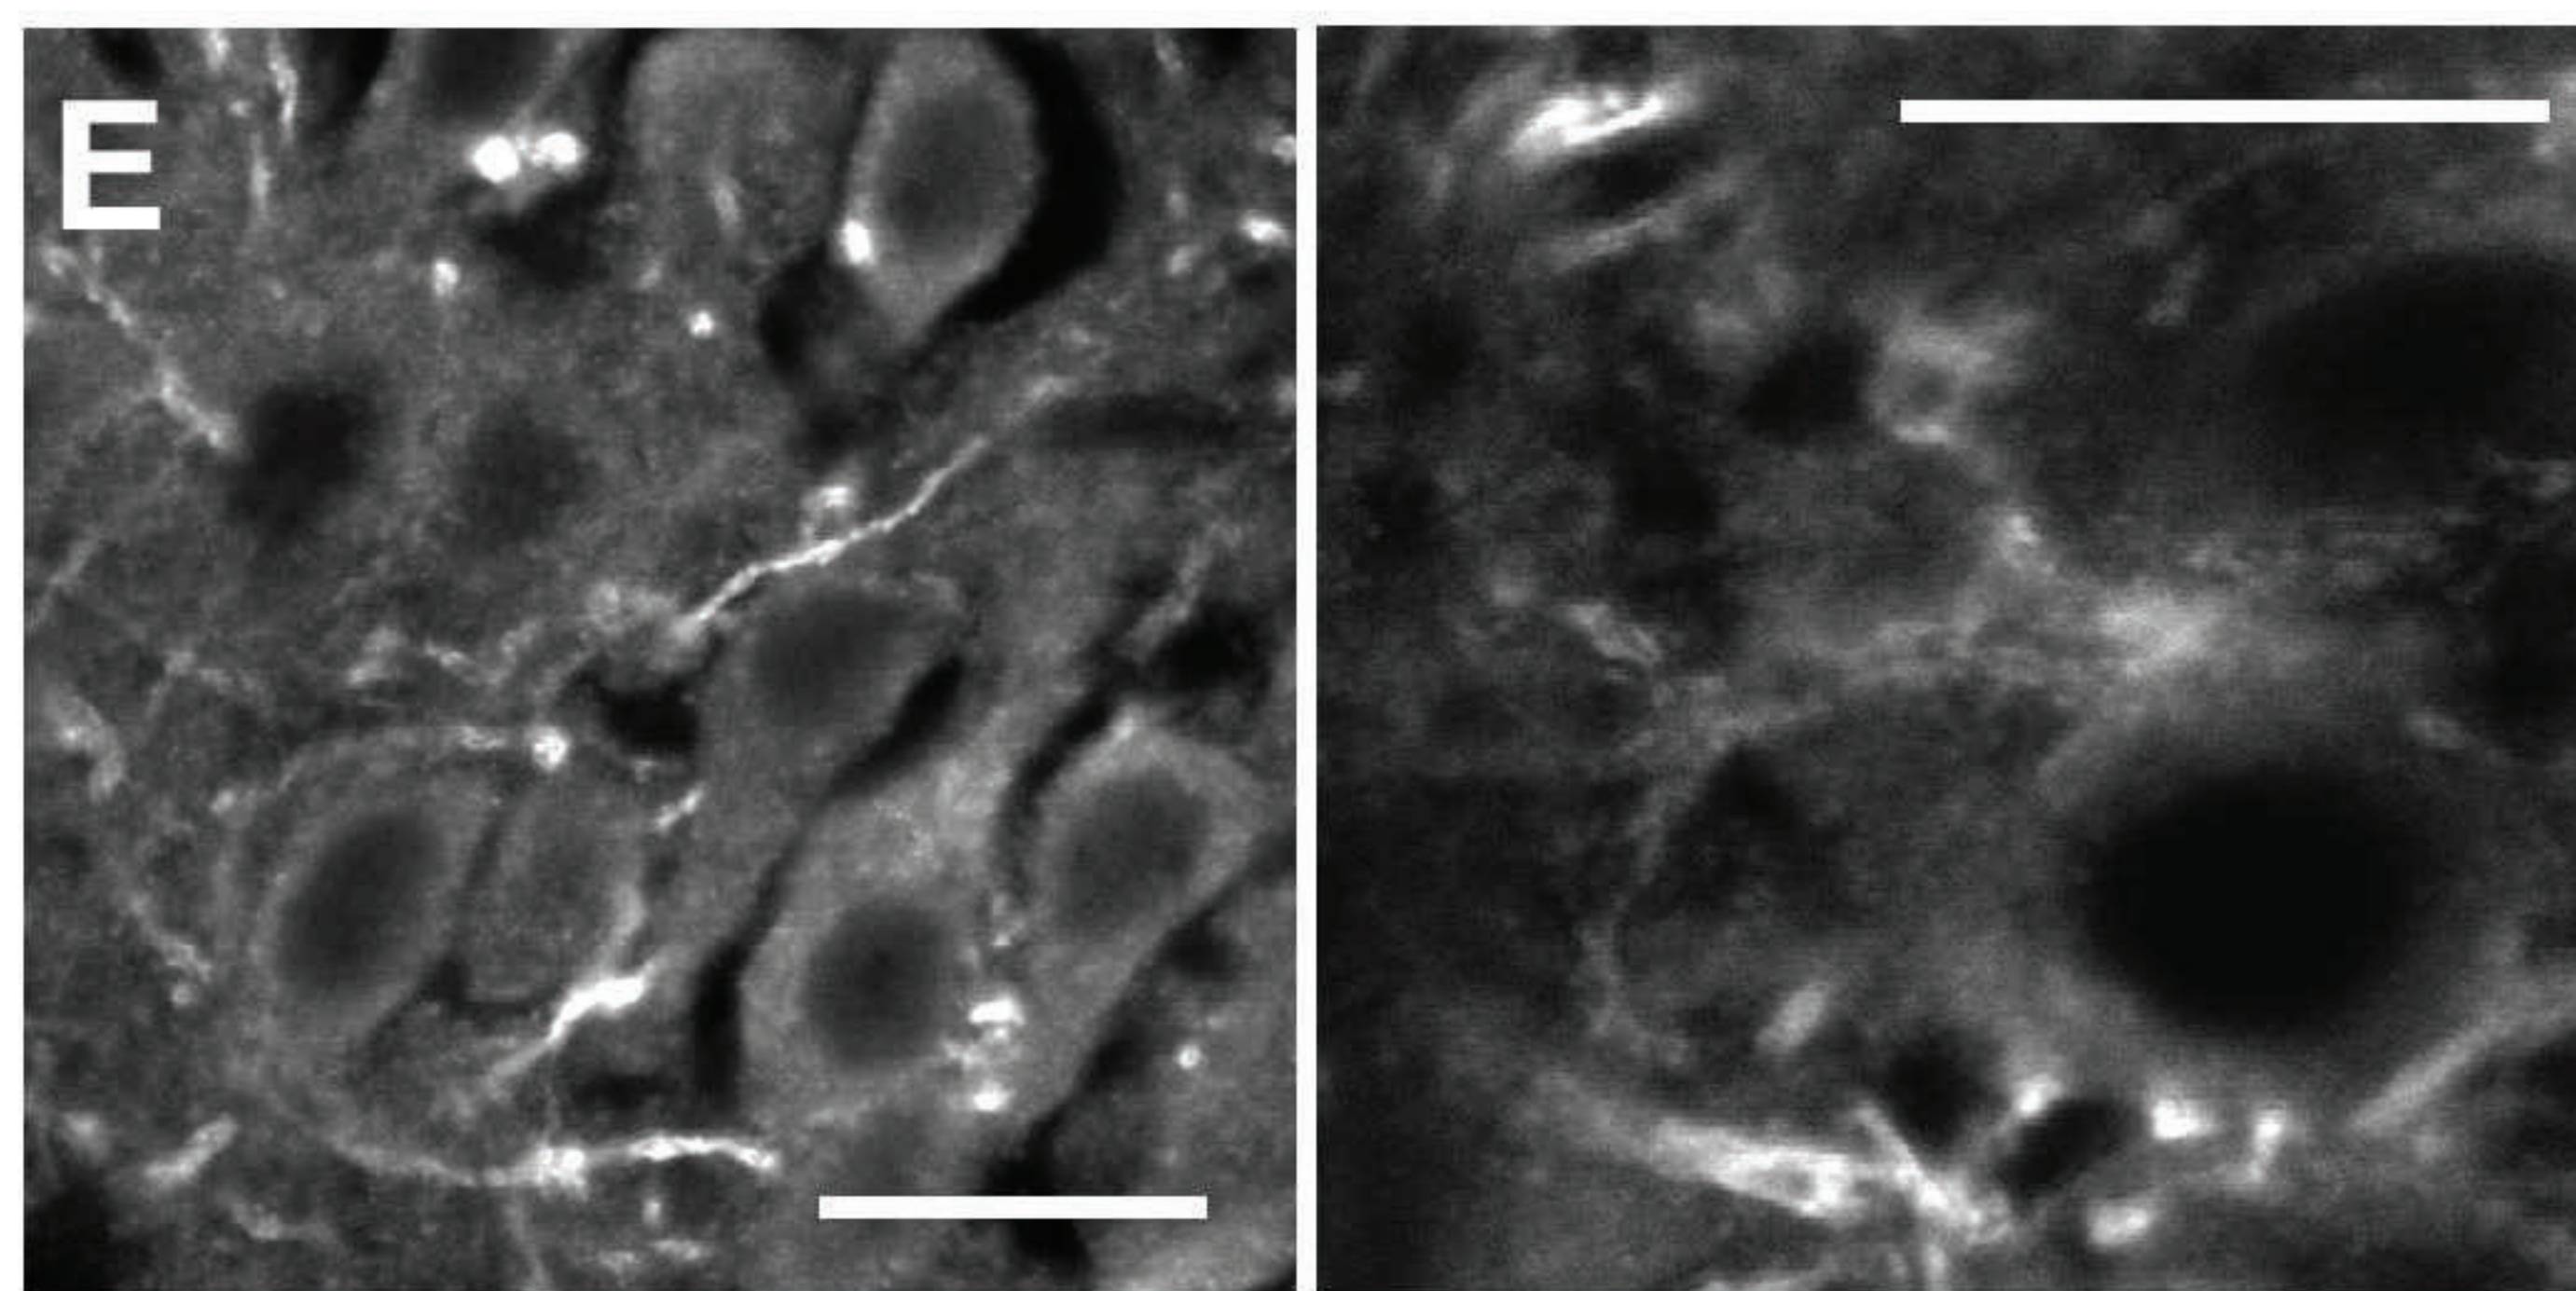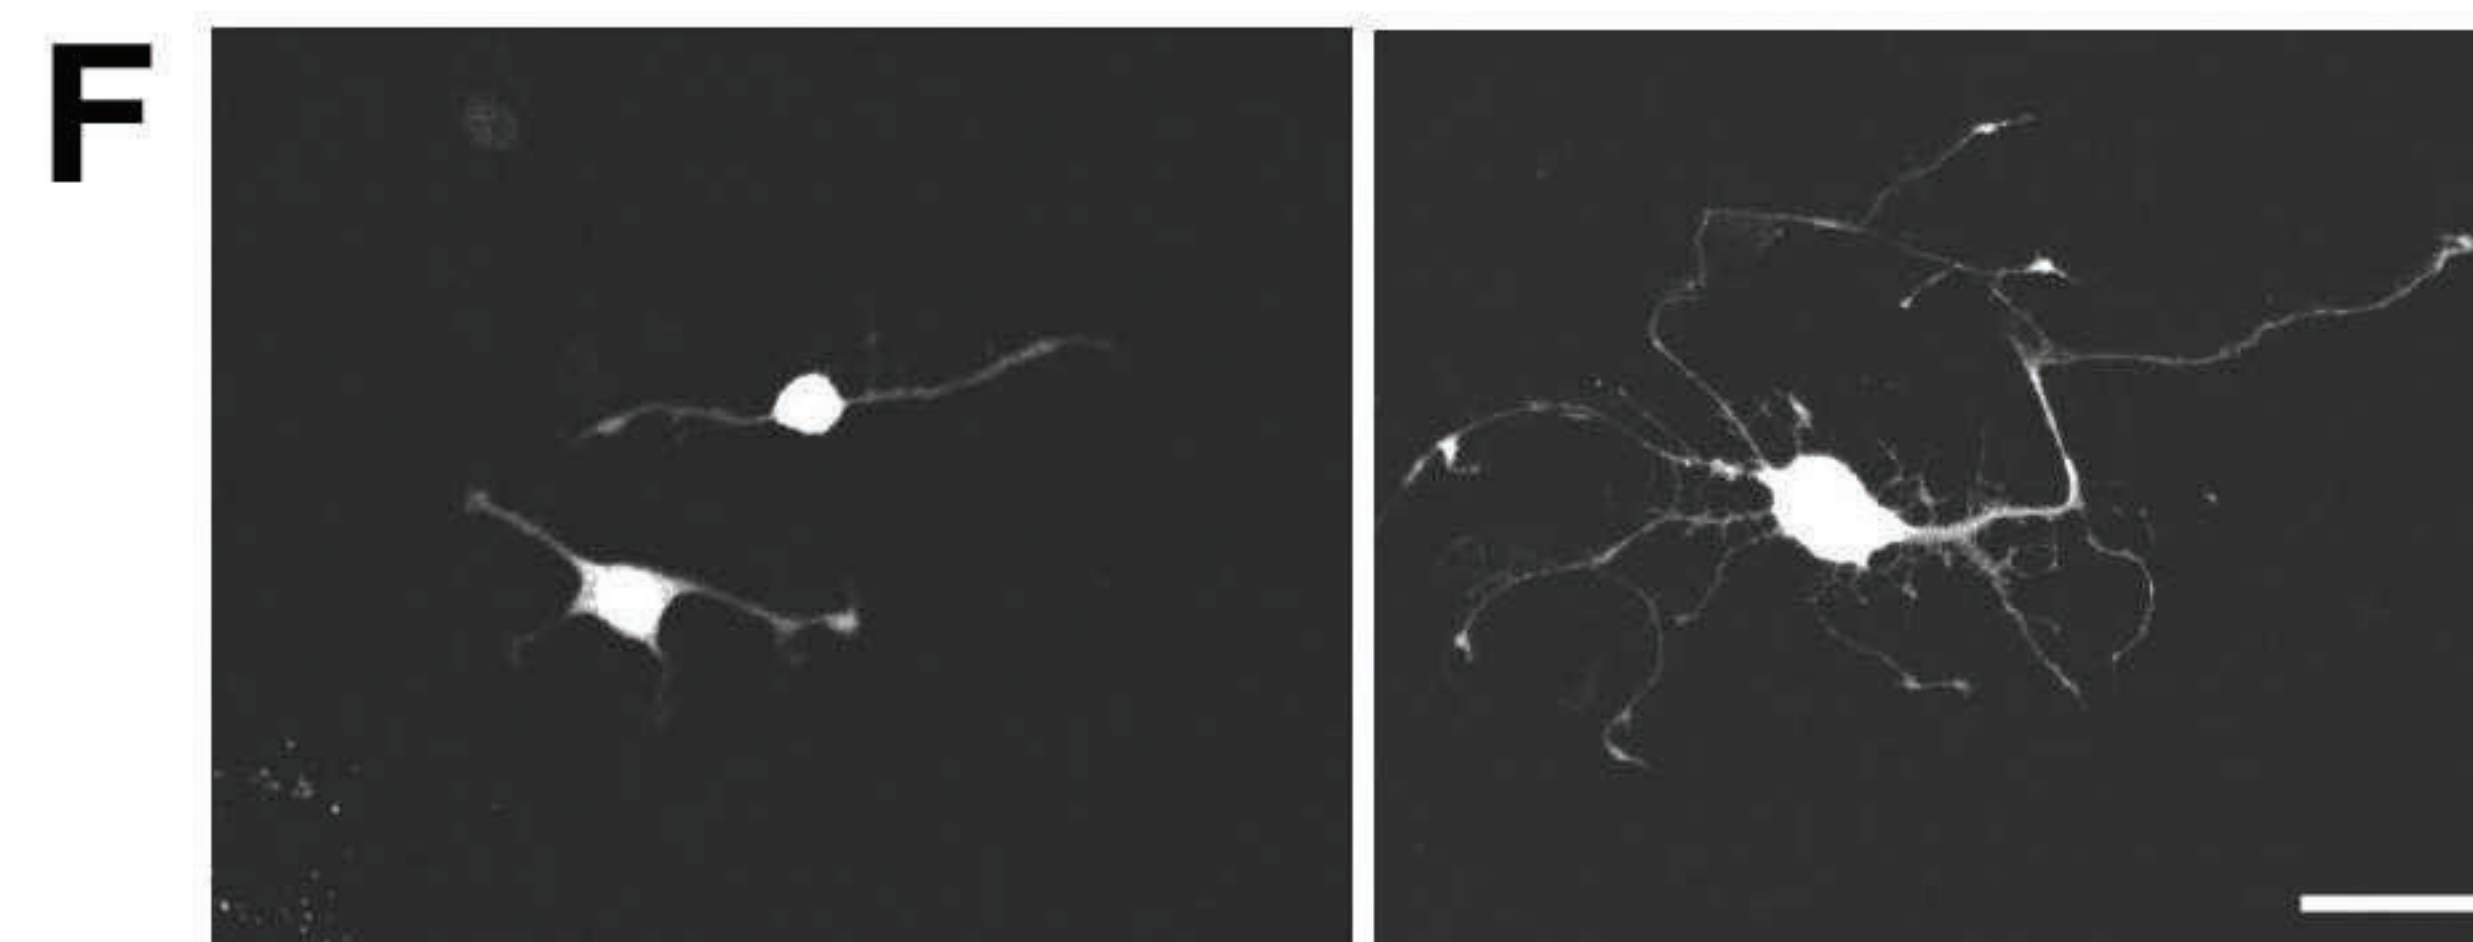

Supplement: pnas_101_41_14949__1.pdf [file pnas_101_41_14949__1.pdf]
